# Supplementary figures and images for: Neutral DNA–avidin nanoparticles as ultrasensitive reporters in immuno-PCR
Source: Royal Society of Chemistry journal article supplement (doi:10.1039/d0an00134a), 2020-01-01

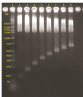

Supplement: d0an00134a2.pdf [file d0an00134a2.pdf]

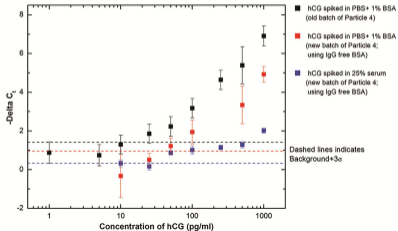

Supplement: d0an00134a4.pdf [file d0an00134a4.pdf]
